# Supplementary material for: Fibroblastic niches prime T cell alloimmunity through Delta-like Notch ligands
Source: JCI journal article supplement (doi:10.1172/jci89535), 2017-03-19
Supplement: sd1 [file 1]

# Supplemental Figure 1

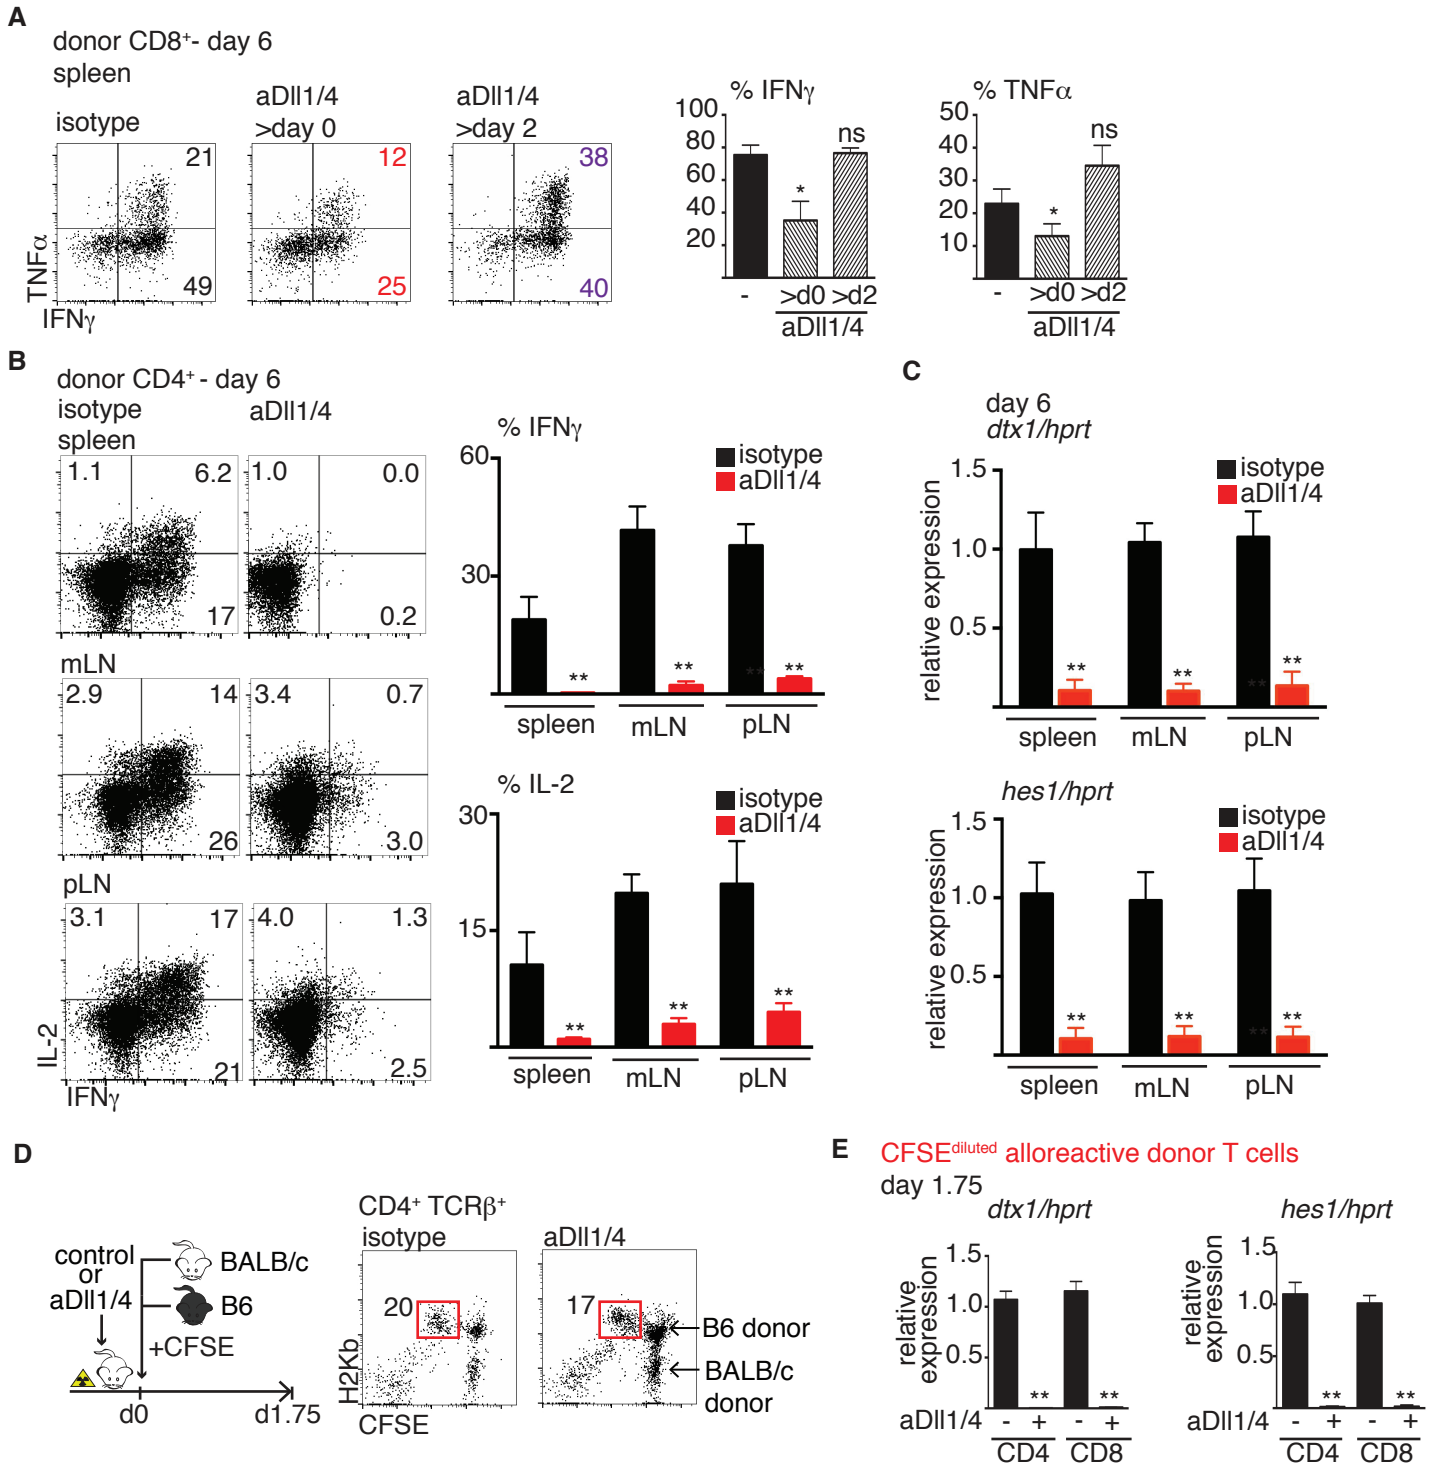

**Supplemental Figure 1. Impact of Notch blockade on proinflammatory cytokine production and Notch target gene expression in donor-derived T cells recovered from spleen and lymph nodes after transplantation.**

**A-B.** Detection of intracellular cytokines in spleen-resident donor CD8<sup>+</sup> T cells (**A**), spleen-resident, mesenteric LN-resident (mLN), or peripheral LN-resident (pLN) donor CD4<sup>+</sup> T cells (**B**) after anti-CD3/CD28 restimulation at day 6 post-transplantation (flow cytometry) (n = 5 mice/group). **C.** Abundance of *Dtx1* and *Hes1* Notch target transcripts (qRT-PCR) in sort-purified CD4<sup>+</sup> T cells from spleen, mLN, and pLN at day 6 post-transplantation. **D.** Experimental and flow cytometric strategy to isolate alloreactive donor CD4<sup>+</sup> and CD8<sup>+</sup> T cells at day 1.75 post-transplantation. Syngeneic BALB/c and allogeneic B6 splenocytes were simultaneously labeled with CFSE and co-injected into lethally irradiated (8.5 Gy) BALB/c mice. Divided CFSE<sup>diluted</sup> B6 cells identified alloreactive T cells and were sort-purified. **E.** Abundance of *Dtx1* and *Hes1* Notch target gene transcripts (qRT-PCR) in sort-purified donor-derived CFSE<sup>low</sup> CD4<sup>+</sup> and CD8<sup>+</sup> T cells (n = 6 mice/group). \*P<0.05, \*\*P<0.01. ns=P>0.05 by unpaired two-tailed Student's t-test. Data are representative of at least 4 experiments, with error bars indicating SD.

## Supplemental Figure 2

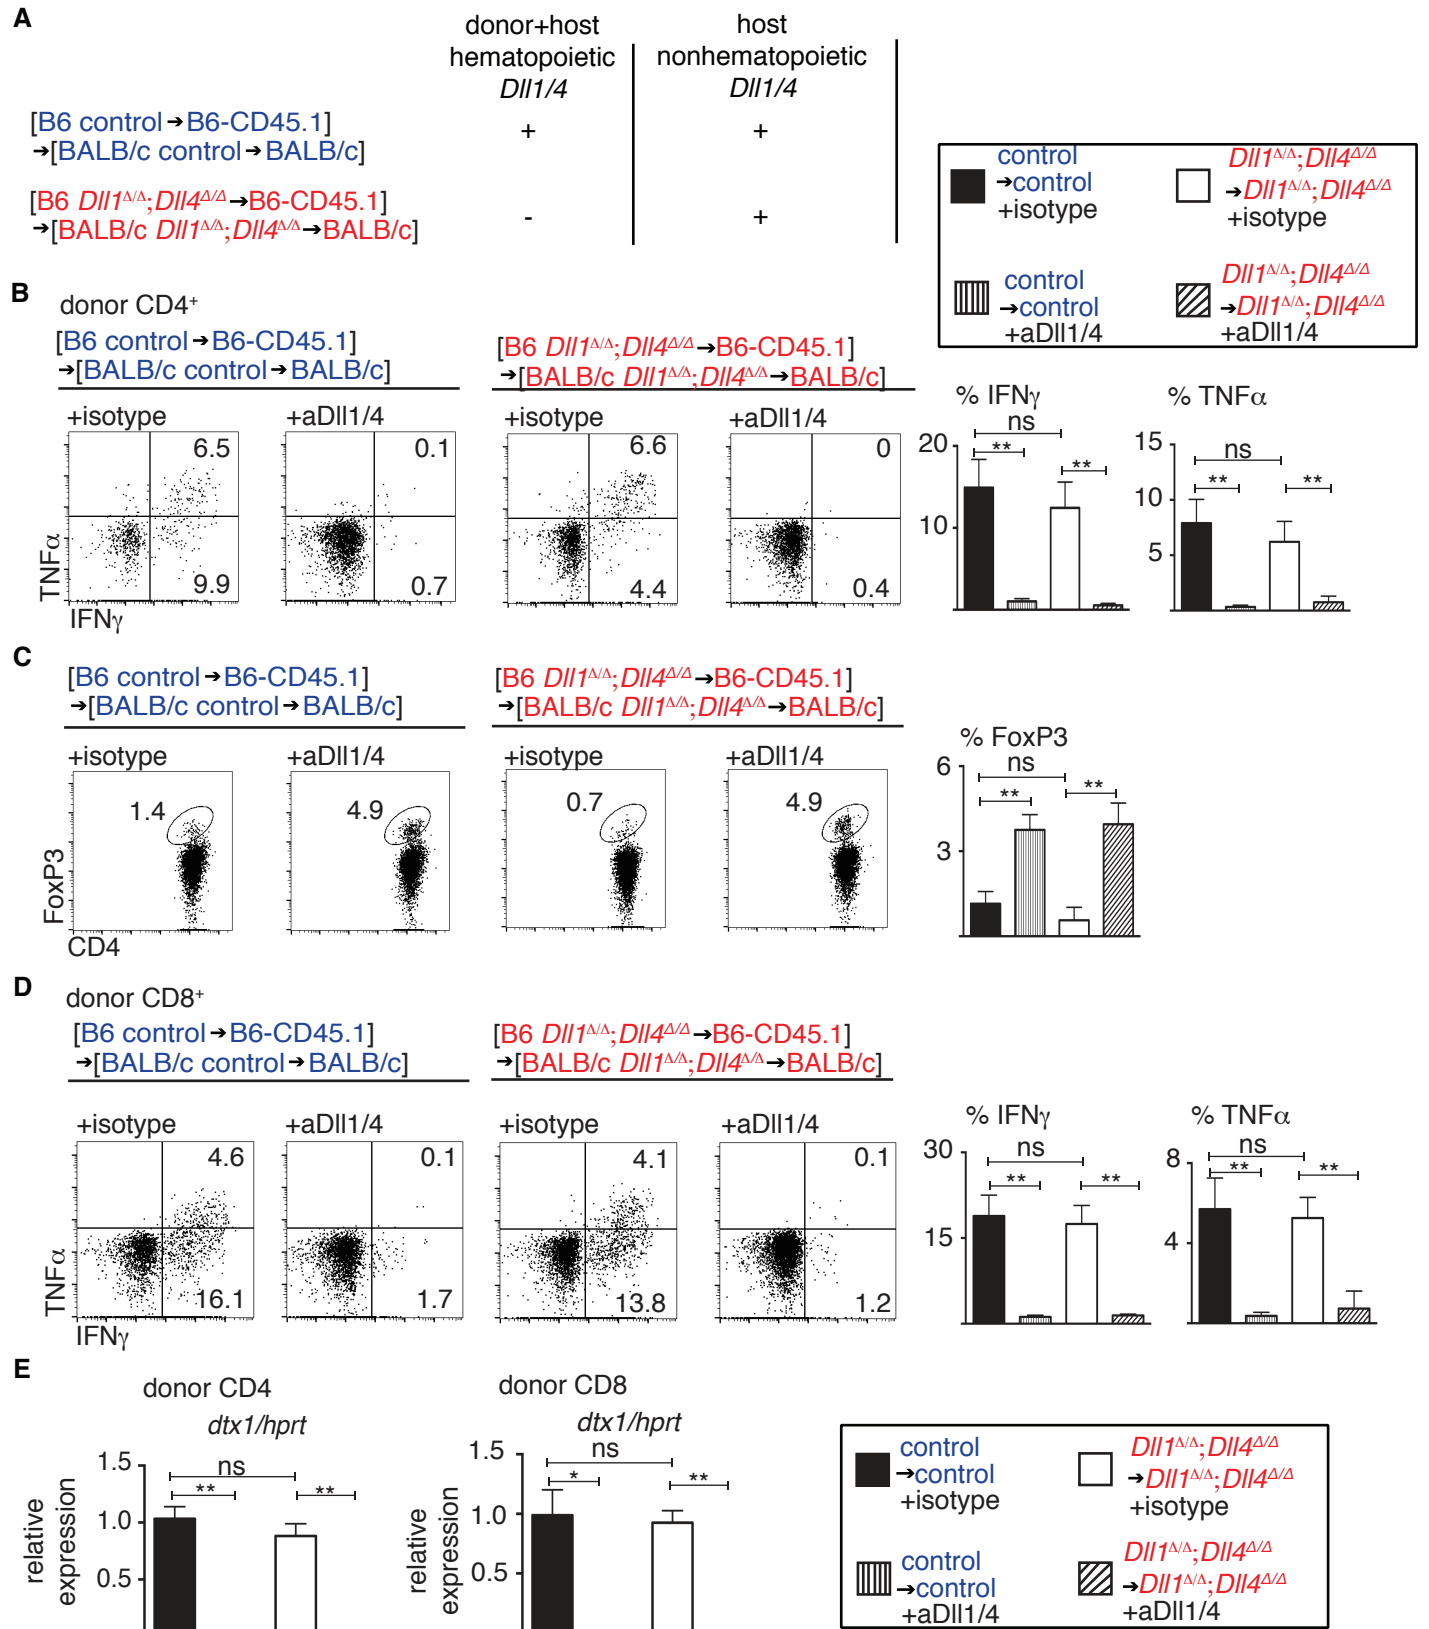

**Supplemental Figure 2. Both donor and host hematopoietic cells are dispensable as cellular sources of Delta-like Notch ligands in acute GVHD.**

**A.** Experimental strategy. BALB/c bone marrow (BM) chimeras were generated by syngeneic transplantation of BALB/c poly(I:C)-induced control or *Tg<sup>Mx1-Cre+</sup>;Dll1<sup>ΔΔ</sup>;Dll4<sup>ΔΔ</sup>* T cell-depleted (TCD) BM into irradiated BALB/c recipients (with T cell depletion performed to remove preexisting mature T cells that may escape *Mx1-Cre*-mediated target gene excision). B6 BM chimeras were generated by syngeneic transplantation of B6 poly(I:C)-induced control or *Tg<sup>Mx1-Cre+</sup>;Dll1<sup>ΔΔ</sup>;Dll4<sup>ΔΔ</sup>* BM into irradiated B6-CD45.1 recipients.  $5 \times 10^6$  TCD BM +  $5 \times 10^6$  allogeneic splenocytes from B6 BM chimeras were transplanted into lethally irradiated (8.5 Gy) BALB/c BM chimeras. Recipient BALB/c BM chimeras were injected i.p. with isotype control or anti-Dll1/4 antibodies. **B.** Intracellular cytokines in donor CD4<sup>+</sup> after anti-CD3/anti-CD28 stimulation at day 7 post-transplantation (n = 5 mice/group). **C.** Intracellular FoxP3 in donor CD4<sup>+</sup> T cells at day 7 post-transplantation (n = 5 mice/group). **D.** Intracellular cytokines in donor CD8<sup>+</sup> T cells after anti-CD3/anti-CD28 stimulation at day 7 post-transplantation (n = 5 mice/group). **E.** Abundance of *Dtx1* Notch target gene transcripts (qRT-PCR) in sort-purified donor CD4<sup>+</sup> T cells or donor CD8<sup>+</sup> T cells at day 7 post-transplantation (n = 5 mice/group). \*P<0.05, \*\*P<0.01, ns=P>0.05 by unpaired two-tailed Student's t-test with Sidak correction for multiple comparisons. Data are representative of at least 3 experiments, with error bars indicating SD.

## Supplemental Figure 3

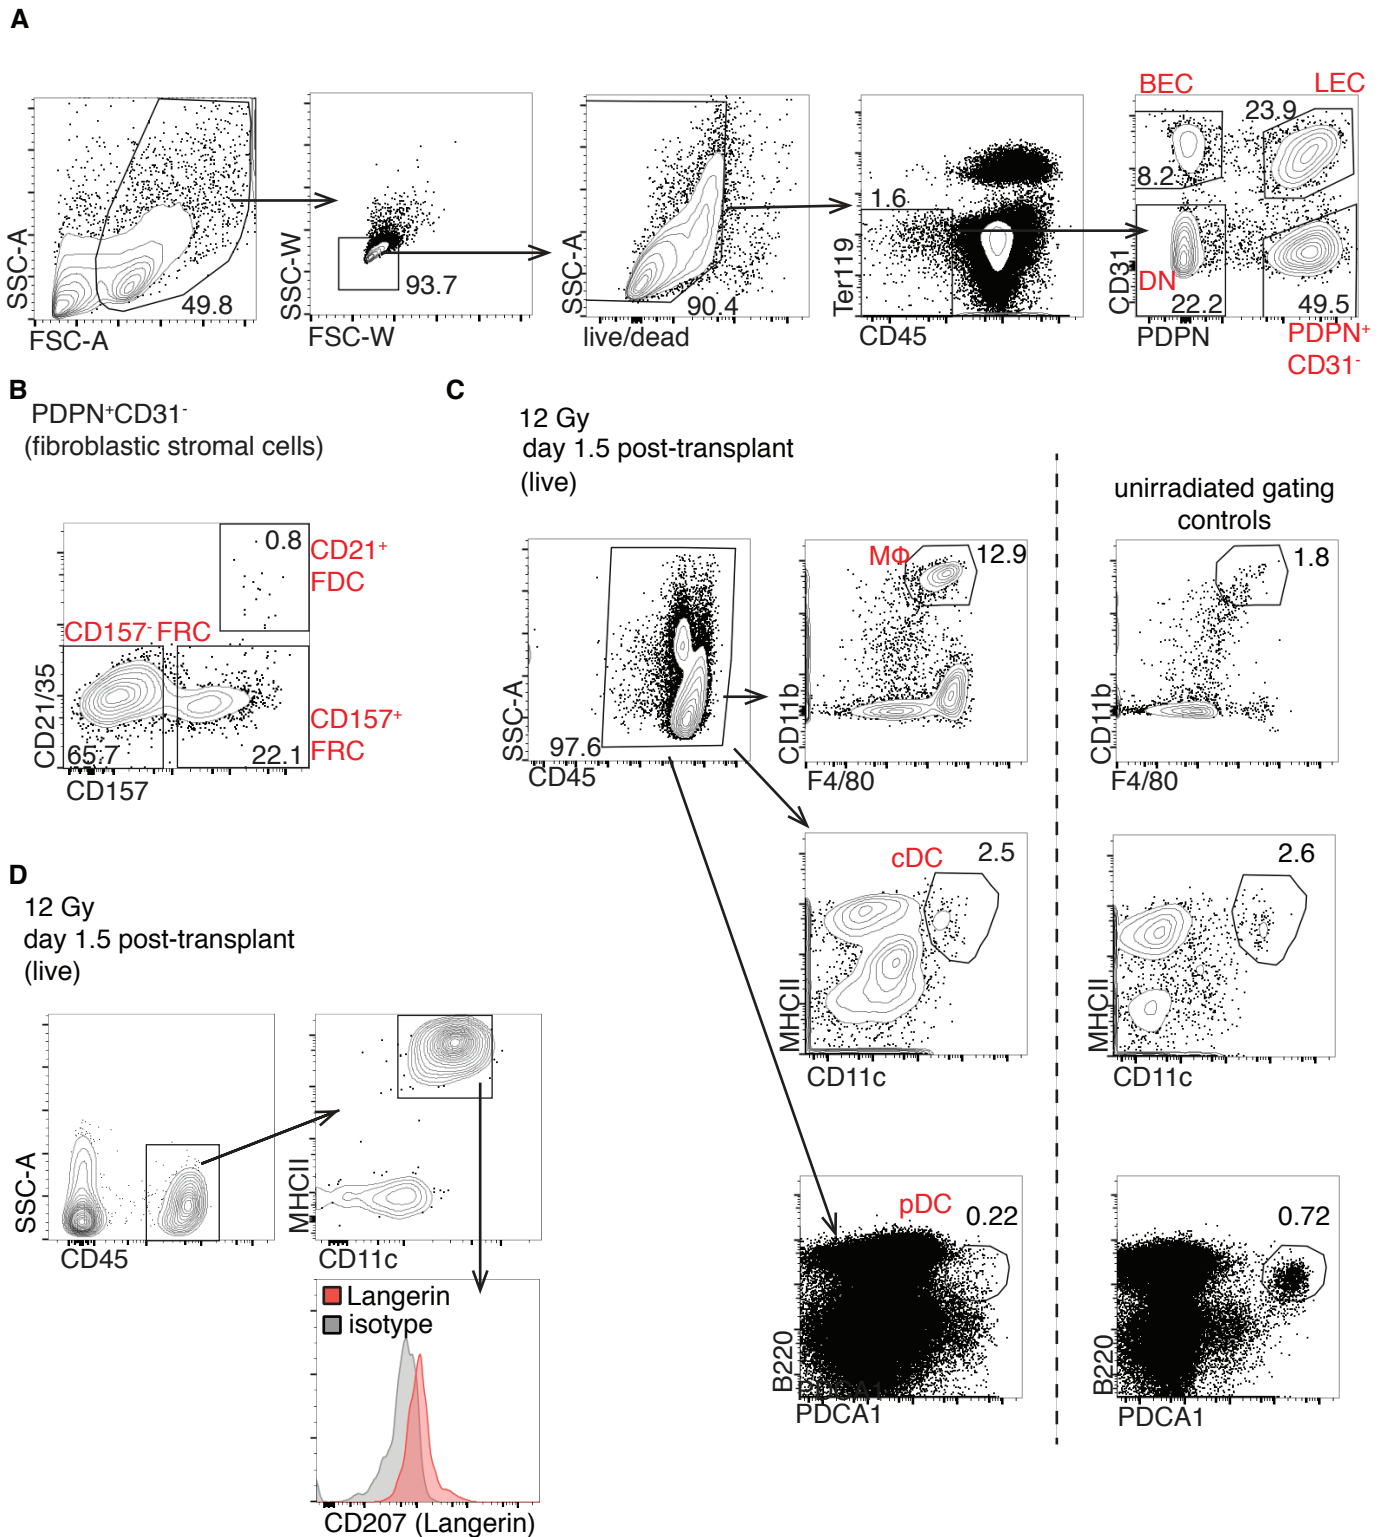

### Supplemental Figure 3. Gating strategy for flow cytometric analysis of lymph node stromal cells and hematopoietic antigen-presenting cells post-irradiation.

Peripheral LNs (cervical, brachial, axial, inguinal) from lethally irradiated (12 Gy) mice receiving allogeneic BALB/c splenocytes were enzymatically digested into a single cell suspension (see **Materials and Methods**) and stained for flow cytometric analysis at day 1.5 post transplantation. **A**. Fibroblastic stromal cells were identified as CD45<sup>-</sup>Ter119<sup>-</sup>PDPN<sup>+</sup>CD31<sup>-</sup>, lymphatic endothelial cells (LECs) as CD45<sup>-</sup>Ter119<sup>-</sup>PDPN<sup>-</sup>CD31<sup>+</sup>, and blood endothelial cells (BECs) as CD45<sup>-</sup>Ter119<sup>-</sup>PDPN<sup>+</sup>CD31<sup>+</sup> cells. **B**. Fibroblastic stromal cells were further subfractionated as CD157<sup>-</sup>CD21/35<sup>-</sup> fibroblastic reticular cells (FRCs), CD157<sup>+</sup>CD21/35<sup>-</sup> FRCs, and CD157<sup>+</sup>CD21/35<sup>+</sup> follicular dendritic cells (FDCs). Macrophages (MΦ) were identified as F4/80<sup>+</sup>CD11b<sup>+</sup>, conventional dendritic cells (cDCs) as CD45<sup>+</sup>CD11c<sup>+</sup>MHCII<sup>hi</sup>, and plasmacytoid dendritic cells (pDCs) as CD45<sup>+</sup>PDCA1<sup>+</sup>B220<sup>int</sup>. Data are representative of at least 4 experiments. **D**. Epidermal sheaths harvested from the ear of irradiated mice were collected at day 1.5 post transplantation and cultured for 2 days in GM-CSF and TNFα to mobilize hematopoietic cells. Langerhans cells were subsequently identified as CD45<sup>+</sup>CD11c<sup>+</sup>MHCII<sup>hi</sup> displaying CD207 (Langerin) expression.

## Supplemental Figure 4

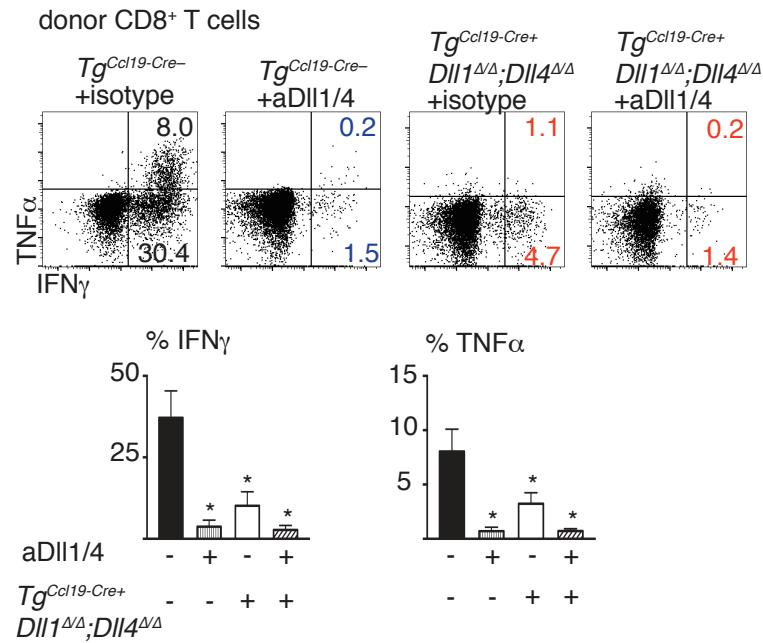

### Supplemental Figure 4. Impact of stromal cell-specific inactivation of DII1/4 Notch ligand genes on proinflammatory cytokine production by CD8<sup>+</sup> donor-derived T cells.

Detection of intracellular cytokines in donor CD8<sup>+</sup> T cells after anti-CD3/anti-CD28 restimulation (day 6 post-transplantation, flow cytometry) (n = 5 mice/group). Control *Tg<sup>Ccl19-Cre-</sup>* recipient mice treated with isotype control antibodies were compared to *Tg<sup>Ccl19-Cre-</sup>* mice receiving anti-DII1/4 antibodies vs. *Tg<sup>Ccl19-Cre+</sup>;DII1 $\Delta\Delta$ ;DII4 $\Delta\Delta$*  mice treated with isotype control or anti-DII1/4 antibodies. \*P<0.05 by unpaired two-tailed Student's t-test with Sidak correction for multiple comparisons. Data are representative of at least 3 experiments, with error bars indicating SD.

## Supplemental Figure 5

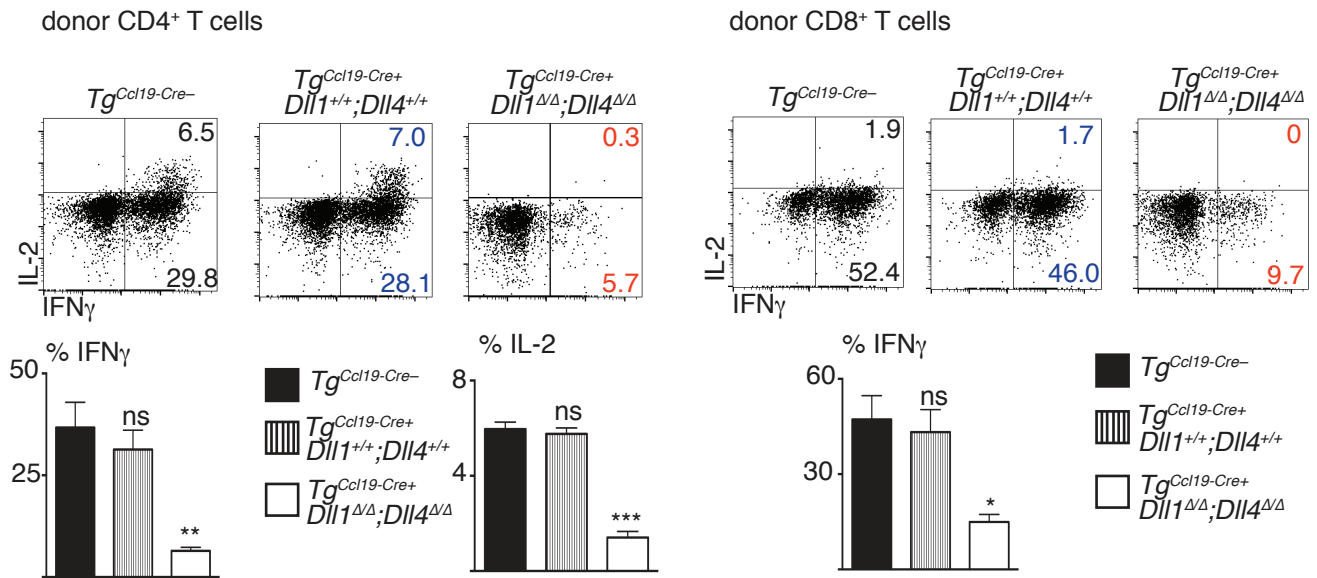

### Supplemental Figure 5. *Ccl19-Cre* expression by itself has no impact on T cell alloreactivity after allogeneic bone marrow transplantation.

$10 \times 10^6$  TCD BM +  $20 \times 10^6$  allogeneic BALB/c splenocytes were transplanted into lethally irradiated (12 Gy) B6 control  $Tg^{Ccl19-Cre-}$ ,  $Tg^{Ccl19-Cre+}; Dll1^{+/+}; Dll4^{+/+}$  or  $Tg^{Ccl19-Cre+}; Dll1^{\Delta\Delta}; Dll4^{\Delta\Delta}$  mice. Detection of intracellular cytokines in donor CD4<sup>+</sup> T cells and CD8<sup>+</sup> T cells after anti-CD3/anti-CD28 stimulation at day 6 post-transplantation (flow cytometry) (n = 5 mice/group). \*P<0.05, \*\*P<0.01, \*\*\*P<0.001, ns=P>0.05 by unpaired two-tailed Student's t-test with Sidak correction for multiple comparisons. Data are representative of 2 experiments, with error bars indicating SD

## Supplemental Figure 6

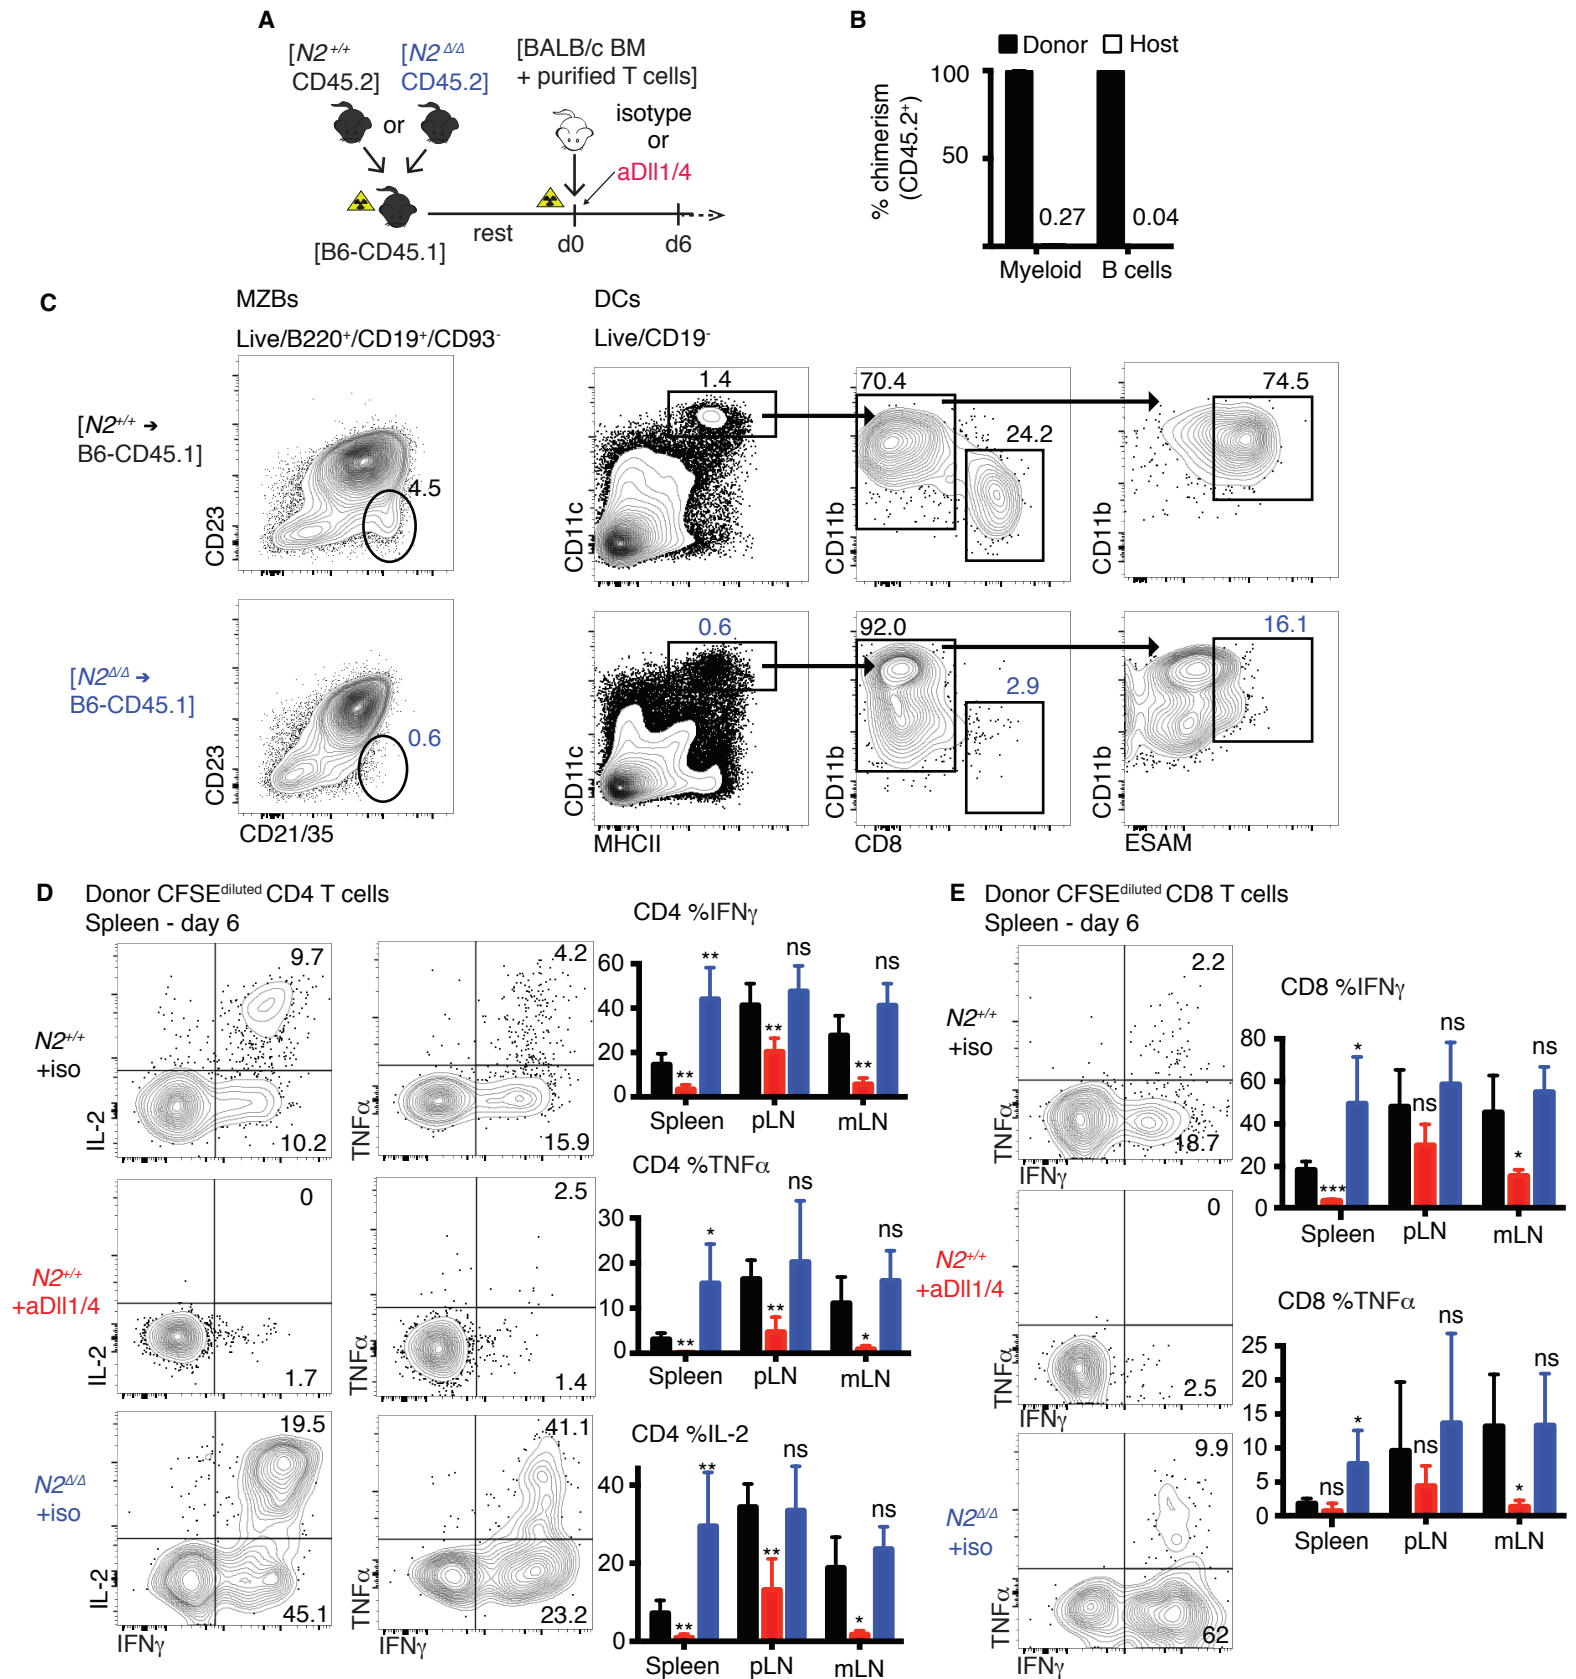

**Supplemental Figure 6. Loss of Notch2-dependent host hematopoietic subsets does not explain the decreased cytokine production of alloreactive T cells with Delta-like/4 blockade.**

**A.** Experimental strategy. Bone marrow (BM) chimeras were generated via transplantation of syngeneic B6-CD45.2 poly(I:C)-induced *Tg<sup>Mx1-Cre+</sup>;N2<sup>fl</sup>* littermate control or *Tg<sup>Mx1-Cre+</sup>;N2<sup>Δ/Δ</sup>* BM into irradiated B6-CD45.1 recipients to generate  $N2^{+/+} \rightarrow B6-CD45.1$  and  $N2^{\Delta/\Delta} \rightarrow B6-CD45.1$  chimeras, respectively. After reestablishment of steady-state hematopoiesis (28 weeks post-transplantation), BM chimeras were subjected to a second allogeneic transplant with BALB/c bone marrow and purified T cells, with or without systemic DII1/4 blockade. **B.** Donor chimerism (frequency of CD45.2+ donor cells) of experimental mice is indicated in blood populations >12 weeks after transplantation. **C.** Analysis of Notch2-dependent splenic populations in  $N2^{+/+} \rightarrow B6-CD45.1$  and  $N2^{\Delta/\Delta} \rightarrow B6-CD45.1$  chimeras. MZBs = marginal zone B cells. Data are representative of 3 mice per group transplanted with the same BM as mice used experimentally in **(D)**. **D.** Intracellular cytokine production by donor CD4+ T cells harvested from spleen, mesenteric lymph node (mLN), or peripheral lymph nodes (pLN) after anti-CD3/anti-CD28 restimulation at day 6 post-transplantation (n = 5 mice/group). **E.** Intracellular cytokine production by donor CD8+ T cells as in **(D)** (n = 5 mice/group). \*P<0.05, \*\*P<0.01, \*\*\*P<0.001, ns=P>0.05 by unpaired two-tailed Student's t-test with Sidak correction for multiple comparisons. Errors bars represent SD.



# Supplemental Figure 7

**A**

Spleen  
*Tg<sup>Ccl19-Cre+</sup>;ROSA26<sup>eYFP</sup>*

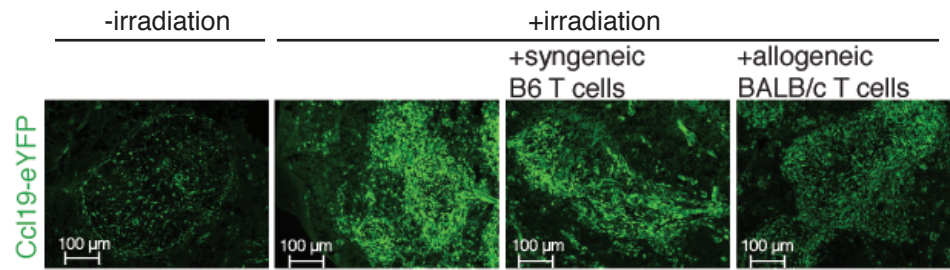

**B**

Spleen  
*Tg<sup>Ccl19-Cre+</sup>;ROSA26<sup>eYFP</sup>*

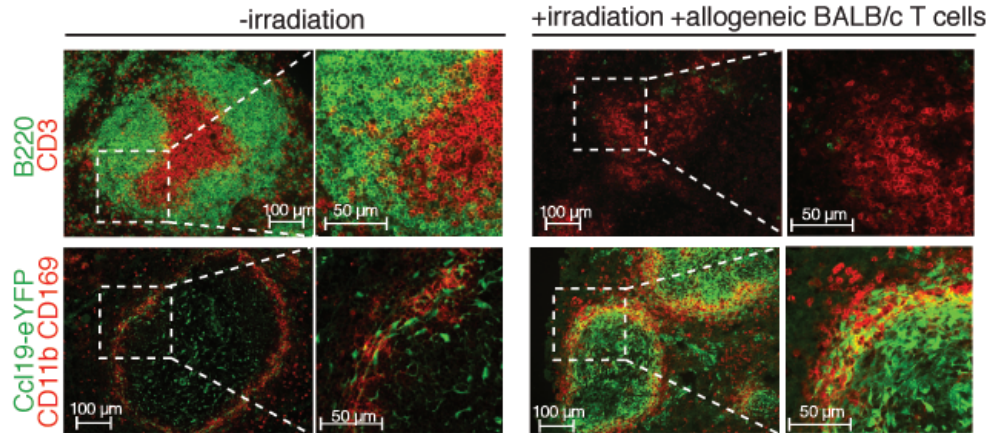

**C**

Spleen  
*Tg<sup>Ccl19-Cre+</sup>;ROSA26<sup>eYFP</sup>*

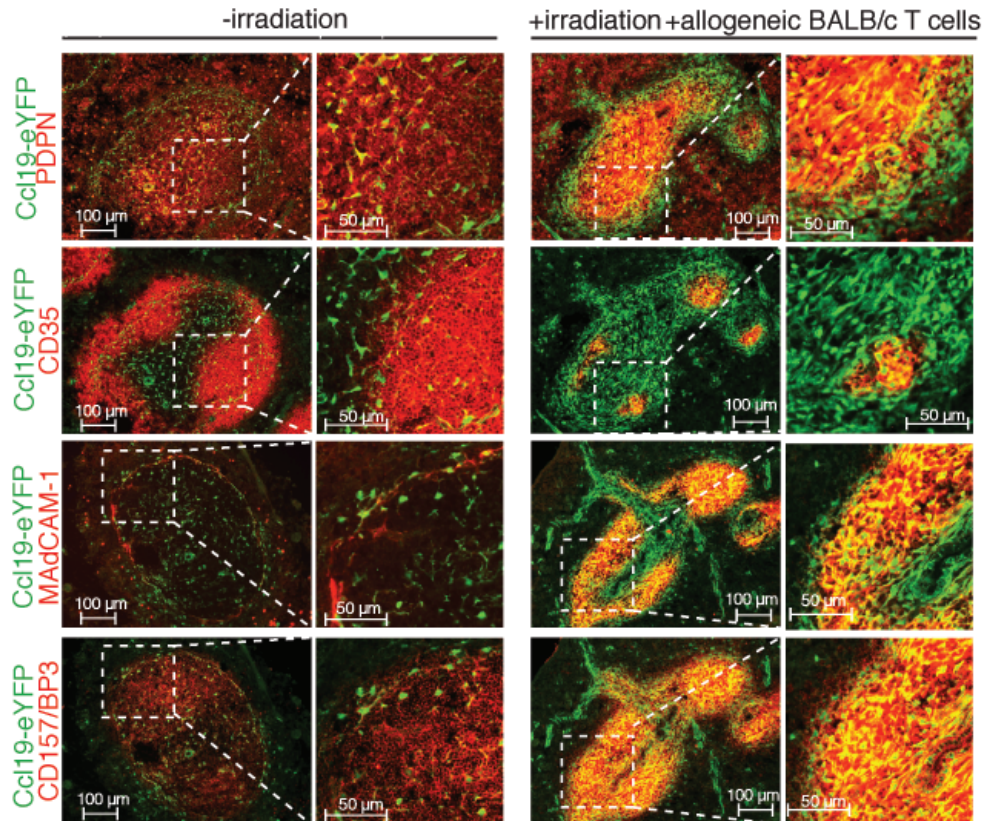

## Supplemental Figure 7. Impact of allogeneic bone marrow transplantation on spleen architecture.

**A-C.** Immunofluorescence microscopy of spleen cryosections from *Tg<sup>Ccl19-Cre+</sup>;ROSA26<sup>eYFP</sup>* reporter mice stained for GFP only (**A**), B220 and CD3 (**B, top panel**), GFP, CD11b, and CD169 (**B, bottom panel**), GFP and podoplanin/gp38 (**C, first panel**), GFP and CD35 (**C, second panel**), GFP and MAdCAM1 (**C, third panel**), or GFP and CD157/BP3 (**C, fourth panel**). Cryosections were prepared from unirradiated or lethally irradiated (12 Gy) mice receiving allogeneic BALB/c CD4<sup>+</sup> T cells at day 1.5 post-transplantation. The high intensity of CD35 staining in the absence of irradiation is due to expression of CD21/35 by B cells. After irradiation and depletion of radiation-sensitive B cells, CD35 staining highlighted stromal cells in the B cell follicles consistent with follicular dendritic cells. Data are representative of 2 experiments.

Supplemental Figure 8

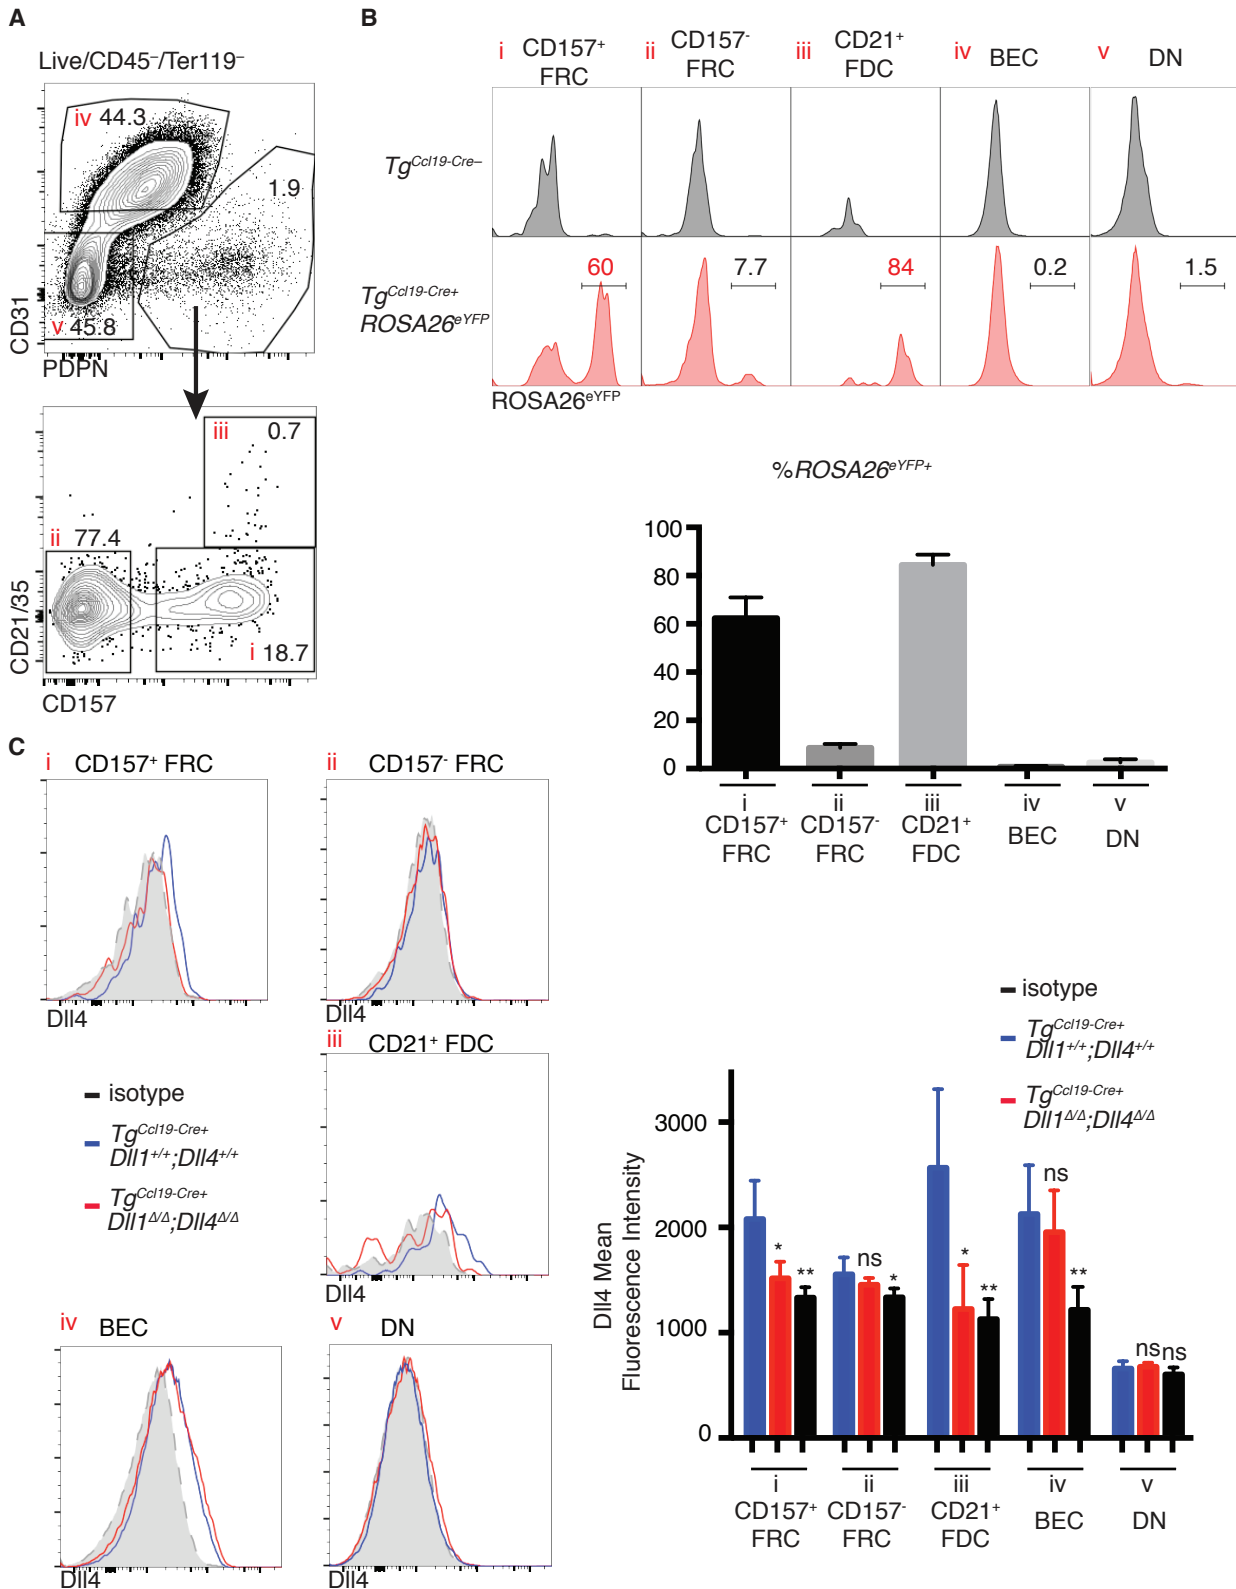

**Supplemental Figure 8. *Ccl19-Cre*<sup>+</sup> lineage-traced stromal cells in the spleen express Dll4 during acute GVHD.**

**A.** Splenic stromal cell subsets. *Tg<sup>Ccl19-Cre+</sup>; ROSA26<sup>eYFP</sup>* or *Tg<sup>Ccl19-Cre-</sup>* mice were lethally irradiated and transplanted with  $10 \times 10^6$  BALB/c bone marrow cells plus  $20 \times 10^6$  allogeneic BALB/c splenocytes. Recipient spleens were collected at 12 hours post-transplantation and enzymatically digested (see **Materials and Methods**) to be analyzed by flow cytometry as in **Figure 3**. Plots represent concatenated data from 5 *Tg<sup>Ccl19-Cre+</sup>; ROSA26<sup>eYFP</sup>* mice. **B.** eYFP expression in spleen-resident stromal subsets. Roman numerals refer to the populations identified in **(A)**. Summary data represent these mice as individual replicates (n=5 mice/group). **C.** Surface Dll4 expression in spleen resident stromal cell subsets from control *Tg<sup>Ccl19-Cre+</sup>; Dll1<sup>+/+</sup>; Dll4<sup>+/+</sup>* and *Tg<sup>Ccl19-Cre+</sup>; Dll1<sup>Δ/Δ</sup>; Dll4<sup>Δ/Δ</sup>* mice. Histograms represent concatenated data from n=5 *Tg<sup>Ccl19-Cre+</sup>; Dll1<sup>+/+</sup>; Dll4<sup>+/+</sup>* and n=4 *Tg<sup>Ccl19-Cre+</sup>; Dll1<sup>Δ/Δ</sup>; Dll4<sup>Δ/Δ</sup>* mice. Bar graphs represent these mice as individual replicates. Mean fluorescence intensity of Dll4 expression in stromal subsets were compared between *Tg<sup>Ccl19-Cre+</sup>; Dll1<sup>+/+</sup>; Dll4<sup>+/+</sup>* and *Tg<sup>Ccl19-Cre+</sup>; Dll1<sup>Δ/Δ</sup>; Dll4<sup>Δ/Δ</sup>*, as well as isotype staining controls by unpaired two-tailed Student's t-test with Sidak correction for multiple comparisons. \*P<0.05, \*\*P<0.01, ns=P>0.05. Errors bars indicate SD.
