# Supplementary material for: Fibroblastic niches prime T cell alloimmunity through Delta-like Notch ligands
Source: JCI journal article supplement (doi:10.1172/jci89535), 2017-03-19
Supplement: sd1 [file 1]

301 Moved Permanently

# Moved Permanently

The document has moved here.
